# Supplementary material for: Method validation of a set of 12 GEM® Premier™ 4000 blood gas analyzers for point-of-care testing in a university teaching hospital
Source: PubMed Central journal article supplement (PMC5814368; doi:10.1016/j.plabm.2017.12.001), 2017-12-13

## **SUPPLEMENTARY DATA LEGENDS**

**Supplementary, Figure 1.** Comparison of results between central laboratory (Lab) and G1 with least rectangle regressions (A, B, C, D, E, F) and difference plots (G, H, I, J, K, L) for  $\text{Na}^+$  (A, G),  $\text{Cl}^-$  (B, H),  $\text{K}^+$  (C, I),  $\text{Ca}^{2+}$  (D, J), lactate (E, K), Hb (F, L).

$\text{Na}^+$ : sodium,  $\text{Cl}^-$ : chloride,  $\text{K}^+$ : potassium,  $\text{Ca}^{2+}$ : calcium, Hb: hemoglobin.

— Mean of differences      ~~± 1.96~~ standard deviation

**Supplementary, Figure 2.** Comparison of results between G1 and G3 with least rectangle regressions (A, B, C, D, E, F, G, H, I) and difference plots (J, K, L, M, N, O, P, Q, R) for pH (A, J),  $p\text{CO}_2$  (B, K),  $p\text{O}_2$  (C, L),  $\text{Na}^+$  (D, M),  $\text{K}^+$  (E, N),  $\text{Ca}^{2+}$  (F, O), lactate (G, P), Hb (H, Q),  $\text{O}_2\text{Hb}$  (I, R).

pH: hydrogen potential,  $p\text{CO}_2$ : partial pressure of  $\text{CO}_2$ ,  $p\text{O}_2$ : partial pressure of  $\text{O}_2$ ,  $\text{Na}^+$ : sodium,  $\text{K}^+$ : potassium,  $\text{Ca}^{2+}$ : calcium, Hb: hemoglobin,  $\text{O}_2\text{Hb}$ : oxyhemoglobin.

— Mean of differences      ~~± 1.96~~ standard deviation

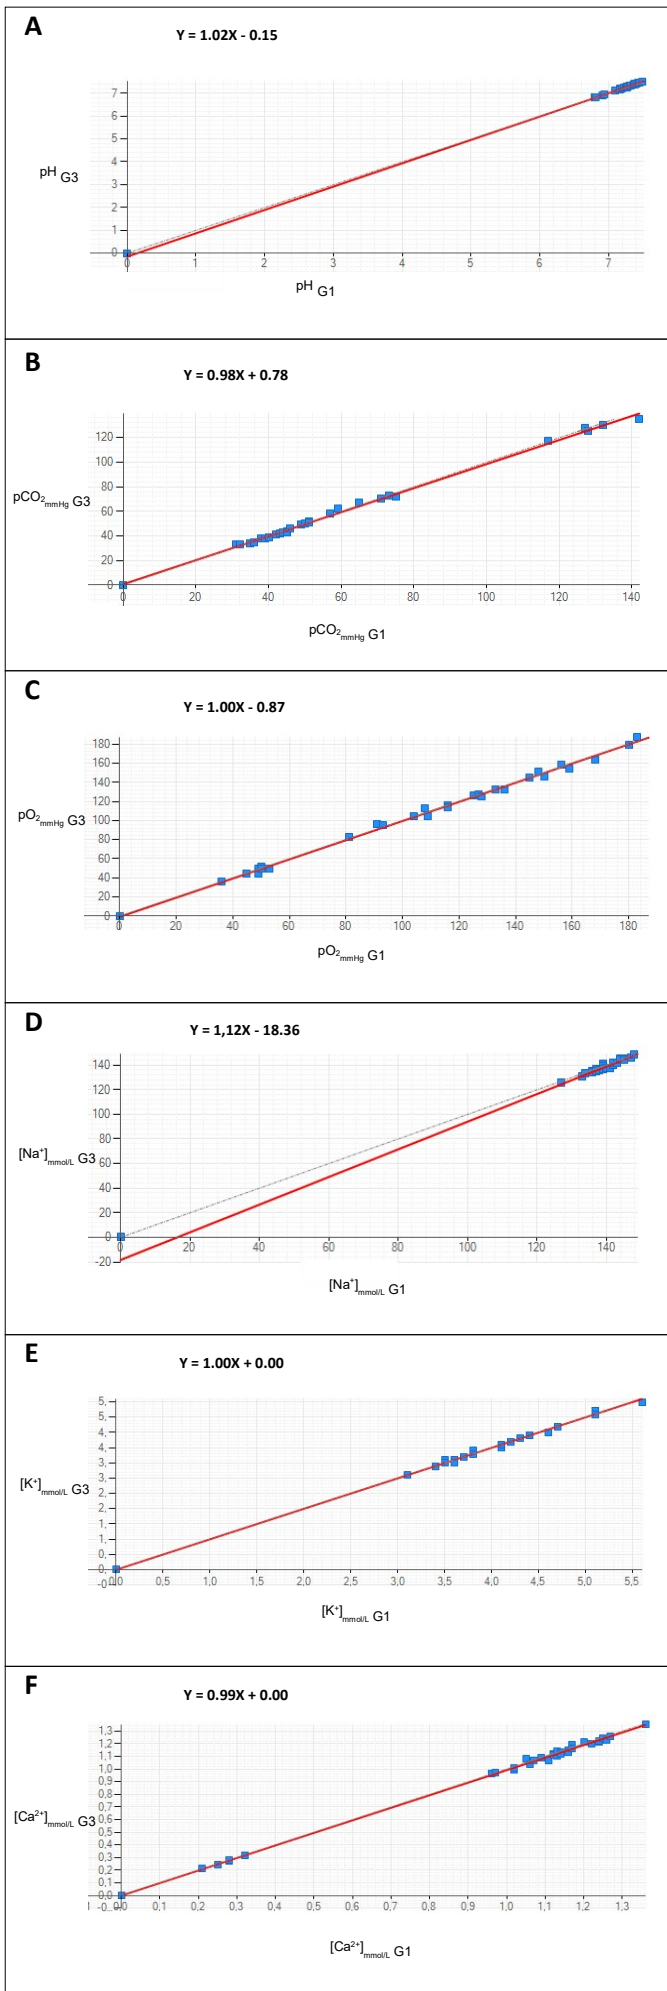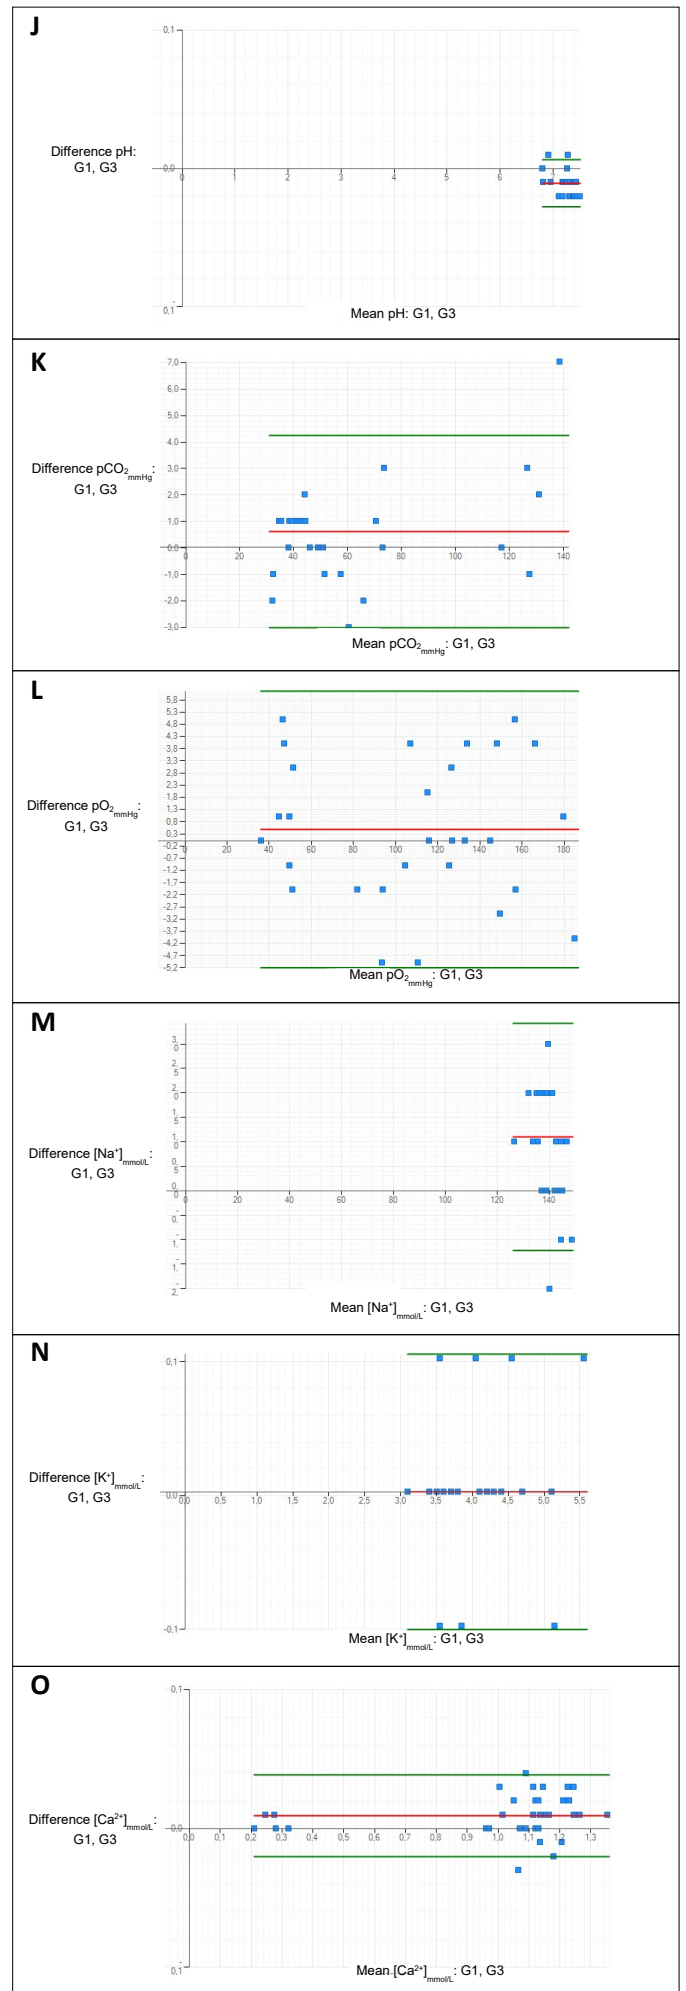

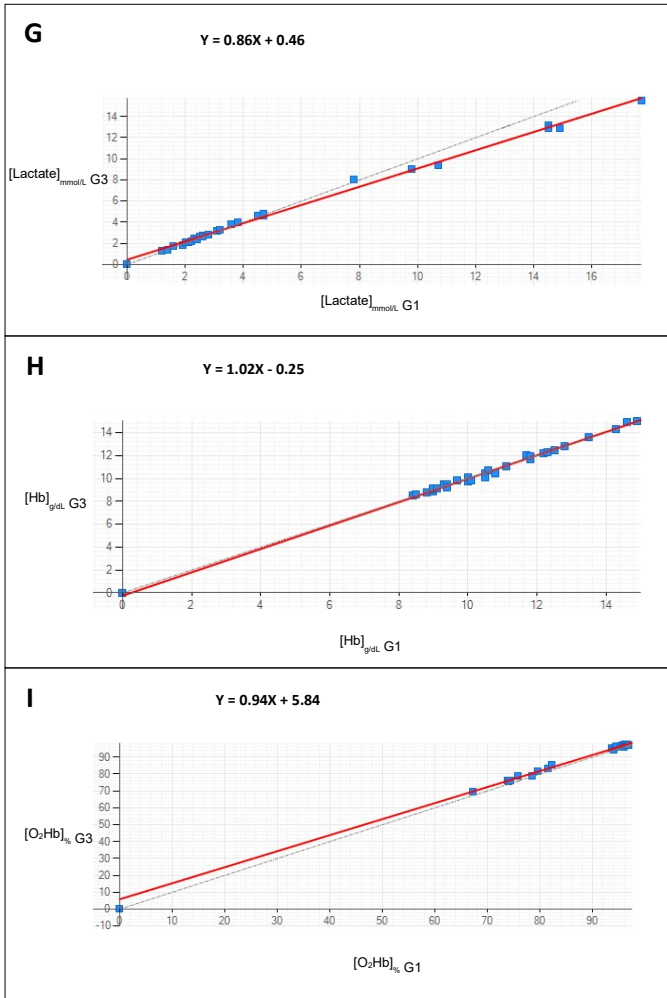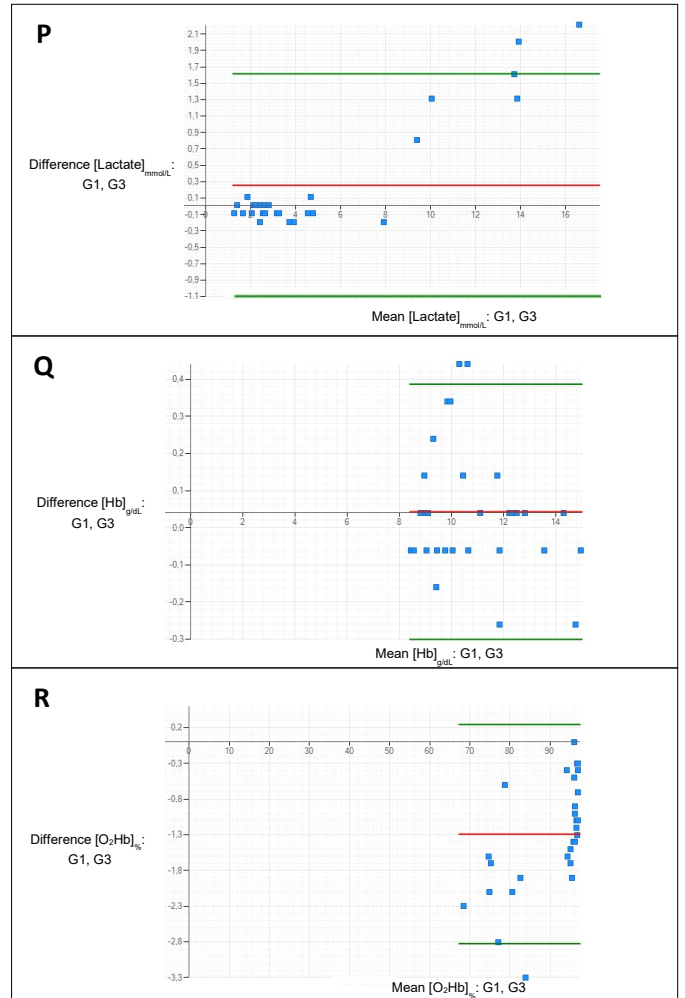

Supplementary , Figure 1 (Oris et al., 2017)

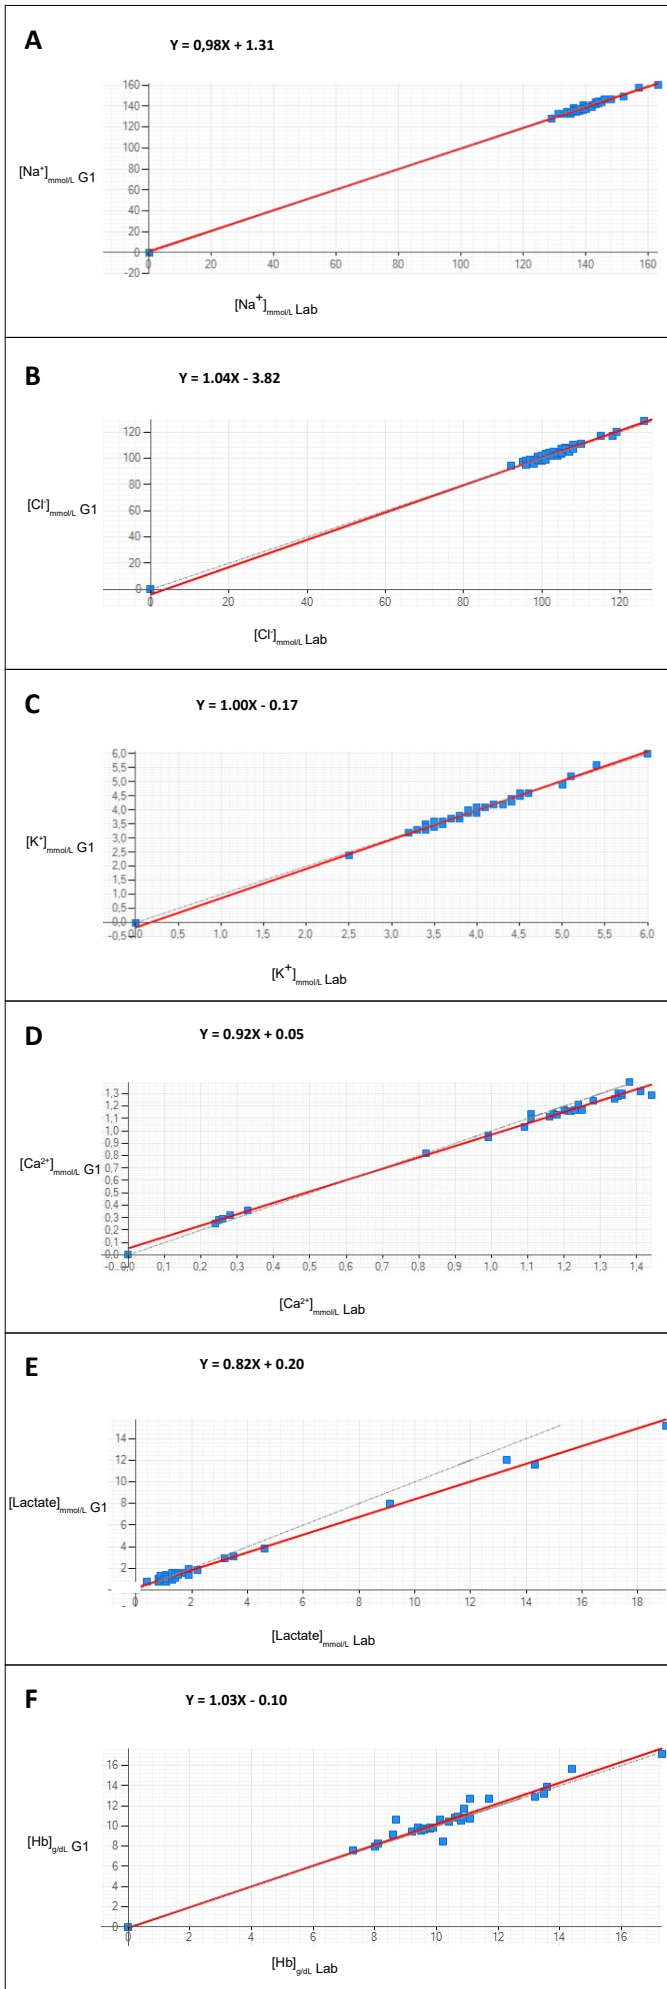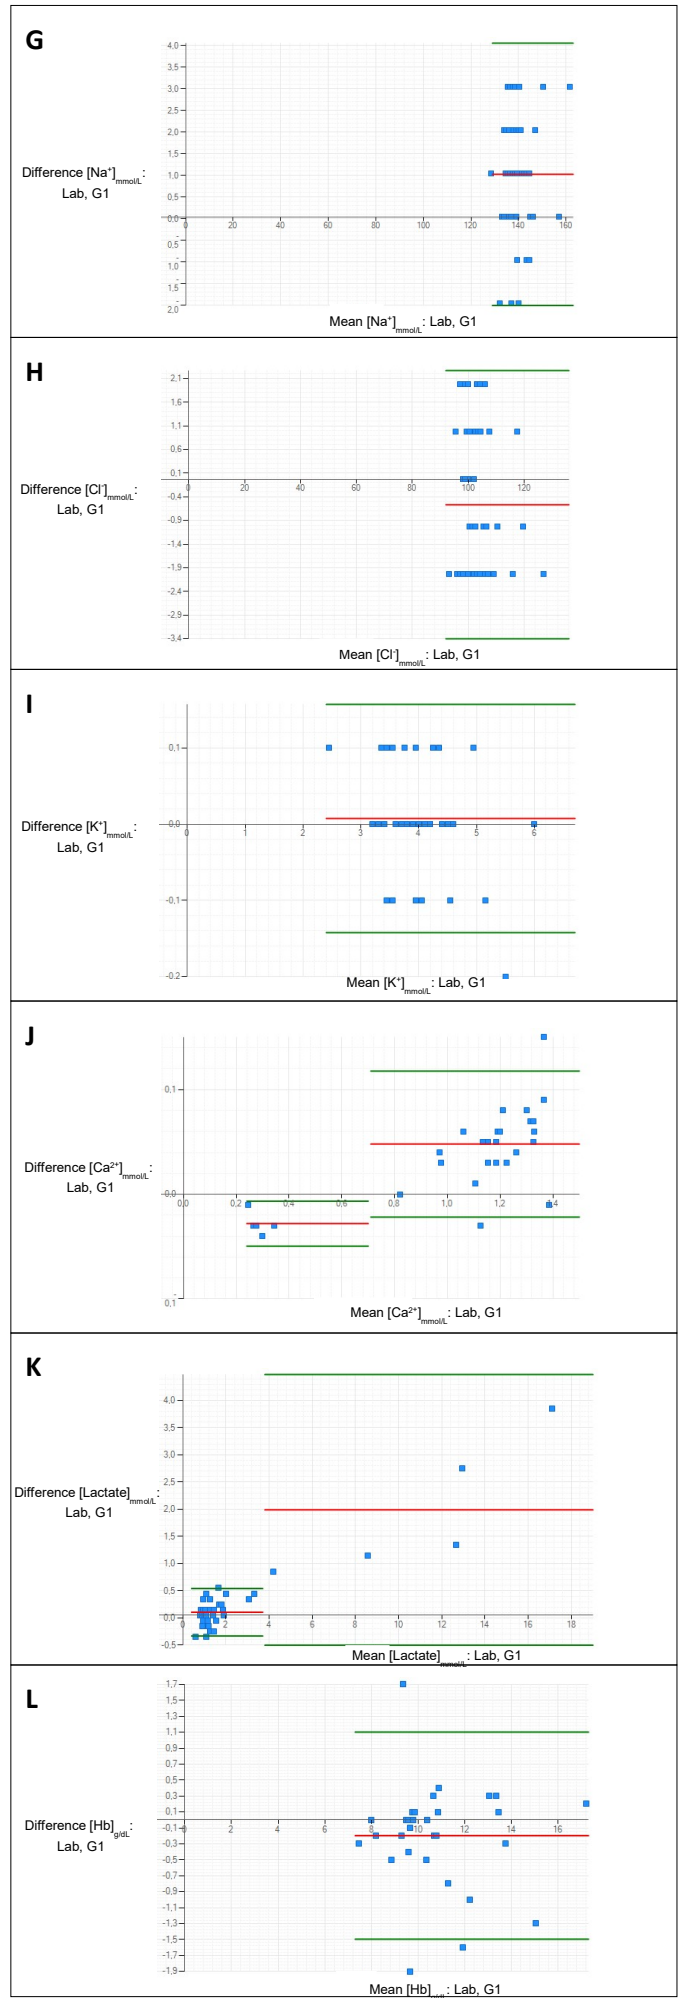

Supplement: mmc1.pdf [file mmc1.pdf]
